# Supplementary material
Source: PubMed Central journal article supplement (PMC2953168)

**SUPPLEMENTARY TABLE S1. Coronaviruses used for phylogenetic analyses**

| CoV group <sup>a</sup> | Virus ID <sup>b</sup>                   | Accession No | Host                                                      | Collection year | Literature reference <sup>c</sup> |
|------------------------|-----------------------------------------|--------------|-----------------------------------------------------------|-----------------|-----------------------------------|
| α                      | BtCoV/512/Scokuh/China/2005             | DQ648858     | Asiatic lesser yellow bat ( <i>Scotophilus kuhlii</i> )   | 2005            | (1)                               |
| α                      | BtCoV/HKU6-1/Myoric/China/2005          | DQ249224     | Rickett's big-footed bat ( <i>Myotis ricketti</i> )       | 2005            | (2)                               |
| α                      | BtCoV/HKU8/Minpus/China/2008            | EU420139     | Small bent-winged bat ( <i>Miniopterus pusillus</i> )     | 2008            | (3)                               |
| α                      | BtCoV/1A/AFCD62/Minmag/China/2005       | EU420138     | Western Bent-Winged Bat ( <i>Miniopterus magnater</i> )   | 2005            | (3)                               |
| α                      | BtCoV/1B/AFCD307/Minpus/China/2006      | EU420137     | Small Bent-winged Bat ( <i>Miniopterus pusillus</i> )     | 2006            | (3)                               |
| α                      | PEDV/CV777/Susscr/Belgium/1977          | AF353511     | Pig ( <i>Sus scrofa</i> )                                 | 1977            | (4)                               |
| α                      | HCoV/229E/Hom sap/UK/1963               | AF304460     | Human ( <i>Homo sapiens</i> )                             | 1963            | (5)                               |
| α                      | BtCoV/HKU2/HK46/Rhisin/China/2006       | EF203065     | Chinese horseshoe bats ( <i>Rhinolophus sinicus</i> )     | 2006            | (6)                               |
| α                      | BtCoV/HKU2/HK33/Rhisin/China/2006       | EF203067     | Chinese horseshoe bats ( <i>Rhinolophus sinicus</i> )     | 2006            | (6)                               |
| α                      | BtCoV/HKU2/GD430/Rhisin/China/2006      | EF203064     | Chinese horseshoe bats ( <i>Rhinolophus sinicus</i> )     | 2006            | (6)                               |
| α                      | BtCoV/HKU2/HK298/Rhisin/China/2006      | EF203066     | Chinese horseshoe bats ( <i>Rhinolophus sinicus</i> )     | 2006            | (6)                               |
| α                      | BtCoV/Trinidad/1FY2BA/C ar per/TTO/2007 | EU769557     | Seba's short-tailed bat ( <i>Carollia perspicillata</i> ) | 2007            | (7)                               |
| α                      | BtCoV/HKU7/1/Mintri/China/2005          | DQ249226     | Greater bent-winged bat ( <i>Miniopterus tristis</i> )    | 2005            | (2)                               |
| α                      | HCoV/NL63/496/Hom sap/Netherlands/2003  | DQ445912     | Human ( <i>Homo sapiens</i> )                             | 2003            | (8)                               |
| α                      | HCoV/NL63/1/Hom sap/Netherlands/2003    | AY567487     | Human ( <i>Homo sapiens</i> )                             | 2003            | (9)                               |
| α                      | HCoV/NL63/Hom sap/Netherlands/1988      | AY518894     | Human ( <i>Homo sapiens</i> )                             | 1988            | (10)                              |
| α                      | HCoV/NL63/057/Hom sap/Netherlands/2004  | DQ445911     | Human ( <i>Homo sapiens</i> )                             | 2004            | (8)                               |
| α                      | BtCoV/GhanaKwam8/Hip sp/Ghana/2008      | FJ710045     | Hipposideros sp.                                          | 2008            | (11)                              |
| α                      | BtCoV/GhanaKwam19/Hip sp/Ghana/2008     | FJ710046     | Hipposideros sp.                                          | 2008            | (11)                              |
| α                      | BtCoV/GhanaBoo344/Hip sp/Ghana/2008     | FJ710044     | Hipposideros sp.                                          | 2008            | (11)                              |
| α                      | TGEV/Purdue/Susscr/USA/1946             | DQ811789     | Pig ( <i>Sus scrofa</i> )                                 | 1946            | (12)                              |
| α                      | FCoV/FIPV79-1146/Fel sil/USA/1980       | DQ010921     | Cat ( <i>Felis silvestris</i> )                           | 1980            | (13)                              |
| α                      | CaCoV/341/Can lup/Italy/2005            | EU856361     | Dog ( <i>Canis lupus familiaris</i> )                     | 2005            | (14)                              |
| α                      | PRCoV/ISU-1/Susscr/USA/1990             | DQ811787     | Pig ( <i>Sus scrofa</i> )                                 | 1990            | (12)                              |
| β                      | BCoV/ENT/Bos pri/USA/1998               | AF391541     | Cattle ( <i>Bos primigenius</i> )                         | 1998            | (15)                              |
| β                      | BCoV/Mebus/Bos pri/1972                 | U00735       | Cattle ( <i>Bos primigenius</i> )                         | 1972            | (16)                              |
| β                      | WtbkCoV/OH-                             | FJ425186     | Waterbuck                                                 | 1994            | (17)                              |

|   |                                         |          |                                                             |      |      |
|---|-----------------------------------------|----------|-------------------------------------------------------------|------|------|
|   | WD358/USA/1994                          |          | <i>(Kobus ellipsiprymnus)</i>                               |      |      |
| β | GiCoV/OH3/WD1421/Gir<br>cam/USA/2003    | EF424623 | Giraffe<br><i>(Giraffa camelopardalis)</i>                  | 2003 | (18) |
| β | AnCoV/OH1/WD1418/Hip<br>nig/USA/2003    | EF424621 | Sable antelope<br><i>(Hippotragus niger)</i>                | 2003 | (19) |
| β | MHV/A59/Mus<br>mus/USA/1949             | FJ647225 | Mouse<br><i>(Mus musculus)</i>                              | 1949 | (20) |
| β | HCoV/HKU1/A/Hom<br>sap/China/2004       | DQ415914 | Human<br><i>(Homo sapiens)</i>                              | 2004 | (21) |
| β | HCoV/HKU1/B/Hom<br>sap/China/2004       | DQ415911 | Human<br><i>(Homo sapiens)</i>                              | 2004 | (21) |
| β | HCoV/HKU1/C/Hom<br>sap/China/2004       | DQ415899 | Human<br><i>(Homo sapiens)</i>                              | 2004 | (21) |
| β | HCoV/OC43/VR759/Hom<br>sap/UK/1967      | AY585228 | Human<br><i>(Homo sapiens)</i>                              | 1967 | (22) |
| β | HCoV/OC43/Paris/Hom<br>sap/France/2001  | AY585229 | Human<br><i>(Homo sapiens)</i>                              | 2001 | (22) |
| β | ECoV/NC99/Equ<br>fer/USA/1999           | EF446615 | Horse<br><i>(Equus ferus)</i>                               | 1999 | (23) |
| β | HCoV/SARS/Tor2/Hom<br>sap/Canada/2003   | AY274119 | Human<br><i>(Homo sapiens)</i>                              | 2003 | (24) |
| β | HCoV/SARS/Urbani/Hom<br>sap/China/2003  | AY278741 | Human<br><i>(Homo sapiens)</i>                              | 2003 | (25) |
| β | HCoV/CUHK-W1/Hom<br>sap/China/2003      | AY278554 | Human<br><i>(Homo sapiens)</i>                              | 2003 | (26) |
| β | HCoV/Frankfurt1/Hom<br>sap/Germany/2003 | AY291315 | Human<br><i>(Homo sapiens)</i>                              | 2003 | (27) |
| β | HCoV/SARS/GZ0204/Hom<br>sap/China/2004  | AY613947 | Human<br><i>(Homo sapiens)</i>                              | 2004 | (28) |
| β | CivCoV/SZ03/Pag<br>lar/China/2003       | AY304486 | Himalayan palm civets<br><i>(Paguma larvata)</i>            | 2003 | (29) |
| β | CivCoV/SARS/SZ16/Pag<br>lar/China/2003  | AY304488 | Himalayan palm civets<br><i>(Paguma larvata)</i>            | 2003 | (29) |
| β | BtCoV/Rp3/Rhi<br>pea/China/2004         | DQ071615 | Pearson's horseshoe bat<br><i>(Rhinolophus pearsoni)</i>    | 2004 | (30) |
| β | BtCoV/HKU3/1/Rhi<br>sin/China/2005      | DQ022305 | Chinese horseshoe bats<br><i>(Rhinolophus sinicus)</i>      | 2005 | (31) |
| β | BtCoV/Rf1/Rhi<br>fer/China/2004         | DQ412042 | Greater horseshoe bat<br><i>(Rhinolophus ferrumequinum)</i> | 2004 | (30) |
| β | BtCoV/Rm1/Rhi<br>mac/China/2004         | DQ412043 | Big-eared horseshoe bat<br><i>(Rhinolophus macrotis)</i>    | 2004 | (30) |
| β | BtCoV/273/Rhi<br>fer/China/2005         | DQ648856 | Greater horseshoe bat<br><i>(Rhinolophus ferrumequinum)</i> | 2005 | (1)  |
| β | BtCoV/GhanaKwam348/Hip<br>sp/Ghana/2008 | FJ710043 | Hipposideros sp.                                            | 2008 | (11) |
| β | BtCoV/GhanaKwam20/Hip<br>sp/Ghana/2008  | FJ710047 | Hipposideros sp.                                            | 2008 | (11) |
| β | BtCoV/HKU4-1/Tyl<br>pac/China/2007      | EF065505 | Lesser bamboo bats<br><i>(Tylonycteris pachypus)</i>        | 2007 | (2)  |
| β | BtCoV/HKU5-1/Pip<br>abr/China/2007      | EF065509 | Japanese pipistrelles<br><i>(Pipistrellus abramus)</i>      | 2007 | (2)  |
| β | BtCoV/HKU5-2/Pip<br>abr/China/2007      | EF065510 | Japanese pipistrelles<br><i>(Pipistrellus abramus)</i>      | 2007 | (2)  |
| β | BtCoV/HKU9-2/Rou                        | EF065514 | Leschenault's rousette                                      | 2007 | (32) |

|   |                                     |          |                                                         |      |      |
|---|-------------------------------------|----------|---------------------------------------------------------|------|------|
|   | les/China/2007                      |          | ( <i>Rousettus lechenaulti</i> )                        |      |      |
| β | BtCoV/133/Tylpac/China/2005         | DQ648794 | Lesser bamboo bat ( <i>Tylonycteris pachypus</i> )      | 2005 | (1)  |
| β | BtCoV/HKU9-1/Roules/China/2007      | EF065513 | Leschenault's rousette ( <i>Rousettus lechenaulti</i> ) | 2007 | (32) |
| β | BtCoV/HKU9-4/Roules/China/2007      | EF065516 | Leschenault's rousette ( <i>Rousettus lechenaulti</i> ) | 2007 | (2)  |
| β | BtCoV/HKU9-3/Roules/China/2007      | EF065515 | Leschenault's rousette ( <i>Rousettus lechenaulti</i> ) | 2007 | (2)  |
| γ | AvCoV/HKU11/796/PycSin/China/2007   | FJ376620 | Chinese bulbul ( <i>Pycnonotus sinensis</i> )           | 2007 | (33) |
| γ | AvCoV/HKU13/3514/Lonstr/China/2007  | FJ376622 | White-rumped munia ( <i>Lonchura striata</i> )          | 2007 | (33) |
| γ | AvCoV/HKU12/600/Turhor/China/2007   | FJ376621 | Grey-backed thrush ( <i>Turdus hortulorum</i> )         | 2007 | (33) |
| γ | AvCoV/IBV/Beaudette/Galgal/USA/1941 | AJ311317 | Chicken ( <i>Gallus gallus</i> )                        | 1941 | (34) |
| γ | AvCoV/TCoV/MG10/Melgal/Canada/2007  | EU095850 | Turkey ( <i>Meleagris gallopavo</i> )                   | 2007 | (35) |
| γ | LeoCoV/F230/Priben/China/2006       | EF584908 | Asian leopard cat ( <i>Prionailurus bengalensis</i> )   | 2006 | (36) |
| γ | WhaleCoV/SW1/Del leu/USA/2006       | EU111742 | Beluga whale ( <i>Delphinapterus leucas</i> )           | 2006 | (37) |

<sup>a</sup>CoV = Coronavirus

<sup>b</sup>Identification code/strain/isolate/typical host/country/collection year. Host species abbreviations are short forms of hosts listed in the fourth column of this table.

<sup>c</sup>References

- 5 1. Tang, X. C., Zhang, J. X., Zhang, S. Y., Wang, P., Fan, X. H., Li, L. F., Li, G., Dong, B. Q., Liu, W., Cheung, C. L., *et al.* (2006) *J Virol* **80**, 7481-7490.
2. Woo, P. C., Lau, S. K., Li, K. S., Poon, R. W., Wong, B. H., Tsoi, H. W., Yip, B. C., Huang, Y., Chan, K. H., & Yuen, K. Y. (2006) *Virology* **351**, 180-187.
3. Chu, D. K., Peiris, J. S., Chen, H., Guan, Y., & Poon, L. L. (2008) *J Gen Virol* **89**, 1282-1287.
- 10 4. Bridgen, A., Duarte, M., Tobler, K., Laude, H., & Ackermann, M. (1993) *J Gen Virol* **74** ( Pt 9), 1795-1804.
5. Thiel, V., Herold, J., Schelle, B., & Siddell, S. G. (2001) *J Gen Virol* **82**, 1273-1281.
6. Lau, S. K., Woo, P. C., Li, K. S., Huang, Y., Wang, M., Lam, C. S., Xu, H., Guo, R., Chan, K. H., Zheng, B. J., *et al.* (2007) *Virology* **367**, 428-439.
- 15 7. Carrington, C. V., Foster, J. E., Zhu, H. C., Zhang, J. X., Smith, G. J., Thompson, N., Auguste, A. J., Ramkissoon, V., Adesiyun, A. A., & Guan, Y. (2008) *Emerg Infect Dis* **14**, 1890-1893.
8. Pyrc, K., Dijkman, R., Deng, L., Jebbink, M. F., Ross, H. A., Berkhout, B., & van der Hoek, L. (2006) *J Mol Biol* **364**, 964-973.
9. van der Hoek, L., Pyrc, K., Jebbink, M. F., Vermeulen-Oost, W., Berkhout, R. J., Wolthers, K. C., Wertheim-van Dillen, P. M., Kaandorp, J., Spaargaren, J., & Berkhout, B. (2004) *Nat Med* **10**, 368-373.
- 20 10. Fouchier, R. A., Hartwig, N. G., Bestebroer, T. M., Niemeyer, B., de Jong, J. C., Simon, J. H., & Osterhaus, A. D. (2004) *Proc Natl Acad Sci U S A* **101**, 6212-6216.
11. Pfefferle, S., Oppong, S., Drexler, J. F., Gloza-Rausch, F., Ipsen, A., Seebens, A., Muller, M. A., Annan, A., Vallo, P., Adu-Sarkodie, Y., *et al.* (2009) *Emerg Infect Dis* **15**, 1377-1384.
- 25 12. Zhang, X., Hasoksuz, M., Spiro, D., Halpin, R., Wang, S., Stollar, S., Janies, D., Hadya, N., Tang, Y., Ghedin, E., *et al.* (2007) *Virology* **358**, 424-435.
13. Dye, C. & Siddell, S. G. (2005) *J Gen Virol* **86**, 2249-2253.
14. Decaro, N., Mari, V., Campolo, M., Lorusso, A., Camero, M., Elia, G., Martella, V., Cordioli, P., Enjuanes, L., & Buonavoglia, C. (2009) *J Virol* **83**, 1532-1537.
- 30 15. Chouljenko, V. N., Lin, X. Q., Storz, J., Kousoulas, K. G., & Gorbalenya, A. E. (2001) *J Gen Virol* **82**, 2927-2933.
16. Chang, R. Y., Hofmann, M. A., Sethna, P. B., & Brian, D. A. (1994) *J Virol* **68**, 8223-8231.
17. Alekseev, K. P., Vlasova, A. N., Jung, K., Hasoksuz, M., Zhang, X., Halpin, R., Wang, S., Ghedin, E., Spiro, D., & Saif, L. J. (2008) *J Virol* **82**, 12422-12431.

18. Hasoksuz, M., Alekseev, K., Vlasova, A., Zhang, X., Spiro, D., Halpin, R., Wang, S., Ghedin, E., & Saif, L. J. (2007) *J Virol* **81**, 4981-4990.
19. Zhang, X., Hasoksuz, M., Spiro, D., Halpin, R., Wang, S., Vlasova, A., Janies, D., Jones, L. R., Ghedin, E., & Saif, L. J. (2007) *Virology* **363**, 1-10.
- 5 20. Coley, S. E., Lavi, E., Sawicki, S. G., Fu, L., Schelle, B., Karl, N., Siddell, S. G., & Thiel, V. (2005) *J Virol* **79**, 3097-3106.
21. Woo, P. C., Lau, S. K., Yip, C. C., Huang, Y., Tsoi, H. W., Chan, K. H., & Yuen, K. Y. (2006) *J Virol* **80**, 7136-7145.
- 10 22. St-Jean, J. R., Jacomy, H., Desforges, M., Vabret, A., Freymuth, F., & Talbot, P. J. (2004) *J Virol* **78**, 8824-8834.
23. Zhang, J., Guy, J. S., Snijder, E. J., Denniston, D. A., Timoney, P. J., & Balasuriya, U. B. (2007) *Virology* **369**, 92-104.
24. He, R., Dobie, F., Ballantine, M., Leeson, A., Li, Y., Bastien, N., Cutts, T., Andonov, A., Cao, J., Booth, T. F., *et al.* (2004) *Biochem Biophys Res Commun* **316**, 476-483.
- 15 25. Rota, P. A., Oberste, M. S., Monroe, S. S., Nix, W. A., Campagnoli, R., Icenogle, J. P., Penaranda, S., Bankamp, B., Maher, K., Chen, M. H., *et al.* (2003) *Science* **300**, 1394-1399.
26. Tsui, S. K., Chim, S. S., & Lo, Y. M. (2003) *N Engl J Med* **349**, 187-188.
27. Thiel, V., Ivanov, K. A., Putics, A., Hertzog, T., Schelle, B., Bayer, S., Weissbrich, B., Snijder, E. J., Rabenau, H., Doerr, H. W., *et al.* (2003) *J Gen Virol* **84**, 2305-2315.
- 20 28. Song, H. D., Tu, C. C., Zhang, G. W., Wang, S. Y., Zheng, K., Lei, L. C., Chen, Q. X., Gao, Y. W., Zhou, H. Q., Xiang, H., *et al.* (2005) *Proc Natl Acad Sci U S A* **102**, 2430-2435.
29. Guan, Y., Zheng, B. J., He, Y. Q., Liu, X. L., Zhuang, Z. X., Cheung, C. L., Luo, S. W., Li, P. H., Zhang, L. J., Guan, Y. J., *et al.* (2003) *Science* **302**, 276-278.
- 25 30. Li, W., Shi, Z., Yu, M., Ren, W., Smith, C., Epstein, J. H., Wang, H., Crameri, G., Hu, Z., Zhang, H., *et al.* (2005) *Science* **310**, 676-679.
31. Lau, S. K., Woo, P. C., Li, K. S., Huang, Y., Tsoi, H. W., Wong, B. H., Wong, S. S., Leung, S. Y., Chan, K. H., & Yuen, K. Y. (2005) *Proc Natl Acad Sci U S A* **102**, 14040-14045.
32. Woo, P. C., Wang, M., Lau, S. K., Xu, H., Poon, R. W., Guo, R., Wong, B. H., Gao, K., Tsoi, H. W., Huang, Y., *et al.* (2007) *J Virol* **81**, 1574-1585.
- 30 33. Woo, P. C., Lau, S. K., Lam, C. S., Lai, K. K., Huang, Y., Lee, P., Luk, G. S., Dyrting, K. C., Chan, K. H., & Yuen, K. Y. (2009) *J Virol* **83**, 908-917.
34. Casais, R., Thiel, V., Siddell, S. G., Cavanagh, D., & Britton, P. (2001) *J Virol* **75**, 12359-12369.
35. Gomaa, M. H., Barta, J. R., Ojkic, D., & Yoo, D. (2008) *Virus Res* **135**, 237-246.
36. Dong, B. Q., Liu, W., Fan, X. H., Vijaykrishna, D., Tang, X. C., Gao, F., Li, L. F., Li, G. J., Zhang, J. X., Yang, L. Q., *et al.* (2007) *J Virol* **81**, 6920-6926.
- 35 37. Mihindukulasuriya, K. A., Wu, G., St Leger, J., Nordhausen, R. W., & Wang, D. (2008) *J Virol* **82**, 5084-5088.

**Supplementary Table S2. Bat Coronaviruses identified in this study**

| CoV genus <sup>a</sup> | Virus ID <sup>b</sup>                          | Host                                                       | RGU              | Accession No |
|------------------------|------------------------------------------------|------------------------------------------------------------|------------------|--------------|
| $\alpha$               | BtCoV/NM98-62/Myo dau/Germany/2008             | Daubenton's bat ( <i>Myotis daubentonii</i> )              | HKU6-related     | GU190216     |
| $\alpha$               | BtCoV/BR98-53/Min sch/Bulgaria/2008            | Large bent-winged bat ( <i>Miniopterus schreibersii</i> )  | HKU8-related     | GU190248     |
| $\alpha$               | BtCoV/BR98-14/Min sch/Bulgaria/2008            | Large bent-winged bat ( <i>Miniopterus schreibersii</i> )  | HKU8-related     | GU190241     |
| $\alpha$               | BtCoV/BR98-37/Min sch/Bulgaria/2008            | Large bent-winged bat ( <i>Miniopterus schreibersii</i> )  | HKU8-related     | GU190245     |
| $\alpha$               | BtCoV/BR98-40/Min sch/Bulgaria/2008            | Large bent-winged bat ( <i>Miniopterus schreibersii</i> )  | HKU8-related     | GU190246     |
| $\alpha$               | BtCoV/BR98-52/Min sch/Bulgaria/2008            | Large bent-winged bat ( <i>Miniopterus schreibersii</i> )  | HKU8-related     | GU190247     |
| $\alpha$               | BtCoV/BR98-18/Min sch/Bulgaria/2008            | Large bent-winged bat ( <i>Miniopterus schreibersii</i> )  | HKU8-related     | GU190242     |
| $\alpha$               | BtCoV/BR98-55/Min sch/Bulgaria/2008            | Large bent-winged bat ( <i>Miniopterus schreibersii</i> )  | BtCoV1A-related  | GU190240     |
| $\alpha$               | BtCoV/BR98-30/Min sch/Bulgaria/2008            | Large bent-winged bat ( <i>Miniopterus schreibersii</i> )  | HKU7-related     | GU190243     |
| $\alpha$               | BtCoV/BR98-31/Min sch/Bulgaria/2008            | Large bent-winged bat ( <i>Miniopterus schreibersii</i> )  | HKU7-related     | GU190244     |
| $\alpha$               | BtCoV/BNM98-30/Nyc lei/Bulgaria/2008           | Leisler's bat ( <i>Nyctalus leisleri</i> )                 | BNM98-30-related | GU190239     |
| $\alpha$               | BtCoV/BB98-15/Rhi bla/Bulgaria/2008            | Blasius's horseshoe bat ( <i>Rhinolophus blasii</i> )      | BB98-15-related  | GU190232     |
| $\alpha$               | BtCoV/BM48-39/Rhi bla/Bulgaria/2008            | Blasius's horseshoe bat ( <i>Rhinolophus blasii</i> )      | BB98-15-related  | GU190234     |
| $\alpha$               | BtCoV/BR98-12/Rhi bla/Bulgaria/2008            | Blasius's horseshoe bat ( <i>Rhinolophus blasii</i> )      | BB98-15-related  | GU190236     |
| $\alpha$               | BtCoV/BM98-05/Rhi bla/Bulgaria/2008            | Blasius's horseshoe bat ( <i>Rhinolophus blasii</i> )      | BB98-15-related  | GU190235     |
| $\alpha$               | BtCoV/BM48-28/Rhi fer/Bulgaria/2008            | Greater horseshoe bat ( <i>Rhinolophus ferrumequinum</i> ) | BB98-15-related  | GU190233     |
| $\alpha$               | BtCoV/BB98-41/Rhi bla/Bulgaria/2008            | Blasius's horseshoe Bat ( <i>Rhinolophus blasii</i> )      | HKU2-related     | GU190238     |
| $\alpha$               | BtCoV/ $\alpha$ /BR98-19/Rhi eur/Bulgaria/2008 | Mediterranean horseshoe Bat ( <i>Rhinolophus euryale</i> ) | HKU2-related     | GU190237     |
| $\beta$                | BtCoV/BB98-16/Rhi bla/Bulgaria/2008            | Blasius's horseshoe bat ( <i>Rhinolophus blasii</i> )      | SARS-related     | GU190217     |
| $\beta$                | BtCoV/BB98-18/Rhi bla/Bulgaria/2008            | Blasius's horseshoe bat ( <i>Rhinolophus blasii</i> )      | SARS-related     | GU190218     |
| $\beta$                | BtCoV/BM98-65/Rhi bla/Bulgaria/2008            | Blasius's horseshoe bat ( <i>Rhinolophus blasii</i> )      | SARS-related     | GU190219     |
| $\beta$                | BtCoV/BM48-34/Rhi fer/Bulgaria/2008            | Greater horseshoe bat ( <i>Rhinolophus ferrumequinum</i> ) | SARS-related     | GU190229     |
| $\beta$                | BtCoV/BM48-48/Rhi bla/Bulgaria/2008            | Blasius's horseshoe Bat ( <i>Rhinolophus blasii</i> )      | SARS-related     | GU190220     |
| $\beta$                | BtCoV/BM48-32/Rhi meh/Bulgaria/2008            | Mehely's horseshoe bat                                     | SARS-            | GU190228     |

|   |                                       |                                                              |              |          |
|---|---------------------------------------|--------------------------------------------------------------|--------------|----------|
|   |                                       | <i>(Rhinolophus mehelyi)</i>                                 | related      |          |
| β | BtCoV/BM48-31/Rhi bla/Bulgaria/2008   | Blasius's horseshoe Bat<br><i>(Rhinolophus blasii)</i>       | SARS-related | GU190215 |
| β | BtCoV/BNM98-29/Rhi fer/Bulgaria/2008  | Greater horseshoe bat<br><i>(Rhinolophus ferrum-equinum)</i> | SARS-related | GU190231 |
| β | BtCoV/BM48-35/Rhi fer/Bulgaria/2008   | Greater horseshoe bat<br><i>(Rhinolophus ferrum-equinum)</i> | SARS-related | GU190230 |
| β | BtCoV/β/BR98-19/Rhi eur/Bulgaria/2008 | Mediterranean horseshoe bat<br><i>(Rhinolophus euryale)</i>  | SARS-related | GU190221 |
| β | BtCoV/BM98-07/Rhi meh/Bulgaria/2008   | Mehely's horseshoe bat<br><i>(Rhinolophus mehelyi)</i>       | SARS-related | GU190227 |
| β | BtCoV/BM98-13/Rhi eur/Bulgaria/2008   | Mediterranean horseshoe bat<br><i>(Rhinolophus euryale)</i>  | SARS-related | GU190223 |
| β | BtCoV/BM98-05/Rhi eur/Bulgaria/2008   | Mediterranean horseshoe bat<br><i>(Rhinolophus euryale)</i>  | SARS-related | GU190225 |
| β | BtCoV/BM98-01/Rhi eur/Bulgaria/2008   | Mediterranean horseshoe bat<br><i>(Rhinolophus euryale)</i>  | SARS-related | GU190222 |
| β | BtCoV/BB98-43/Rhi eur/Bulgaria/2008   | Mediterranean horseshoe bat<br><i>(Rhinolophus euryale)</i>  | SARS-related | GU190226 |
| β | BtCoV/BM48-12/Rhi eur/Bulgaria/2008   | Mediterranean horseshoe bat<br><i>(Rhinolophus euryale)</i>  | SARS-related | GU190224 |

<sup>a</sup>CoV = Coronavirus

<sup>b</sup>Identification code/strain/typical host/country/collection year. Bat species abbreviations are short forms of host species names listed in the fourth column of this table.

**Supplementary Figure 1 (next page). Phylogenetic relationships of the Bulgarian SARS-like virus to Coronavirus prototype strains along selected genomic regions**

Neighbor-joining phylogenies were generated with MEGA, using the Jukes-Cantor substitution model, complete deletion option and 1000 bootstrap reiterations. The scale represents the number of base substitutions per site. Bootstrap values are shown next to the branches; values below 65 and those overlapping with taxon labels or internal nodes were removed for graphical reasons.

The panel shows selected regions from 5' - towards 3' -end of the Coronavirus genome. Genomic

localization of analyzed fragments in comparison to SARS prototype strain TOR2 (GenBank accession number AY274119) were: nsp1=Non-structural protein 1, nucleotides (nt) 265-519;

10 nsp3=non-structural protein 3, nt 2,719-8,484; nsp5=non-structural protein 5, nt 9,985-10,902;

nsp13=non-structural protein 13 (Helicase), nt 16,167-17,960; S=Spike, nt 21,492-25,259;

E=Envelope, nt 26,117-26,347; M=Membrane, nt 26,398-27,063; N=Nucleocapsid, nt 28,120-29,388

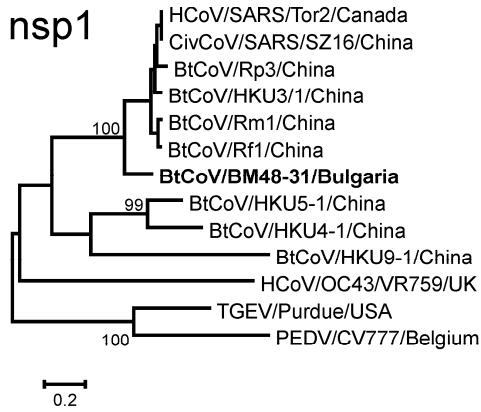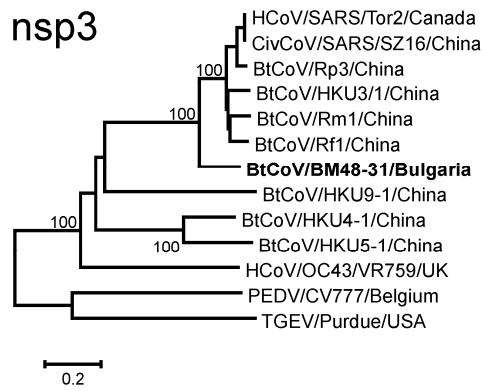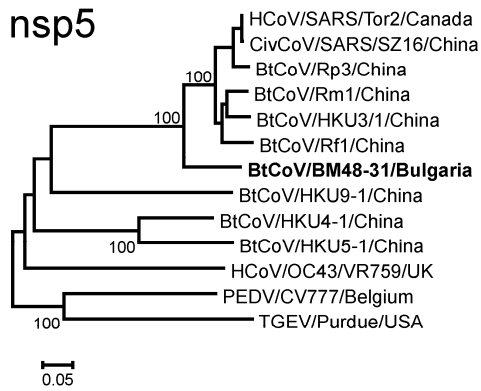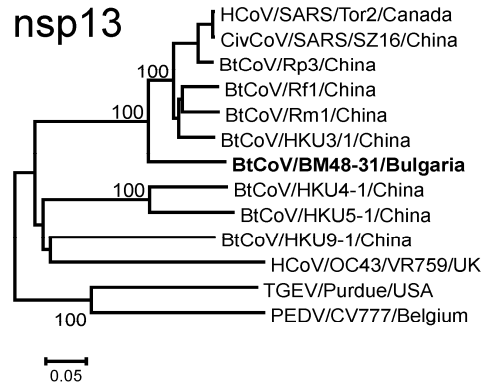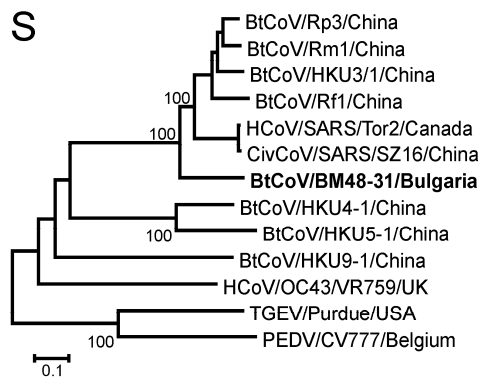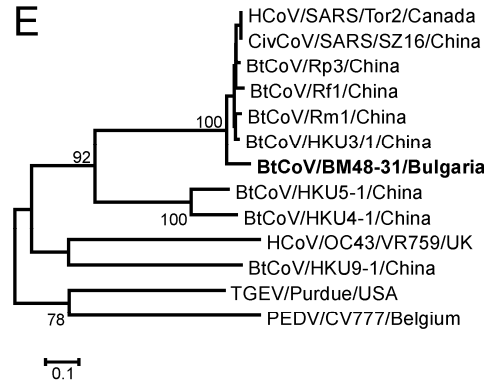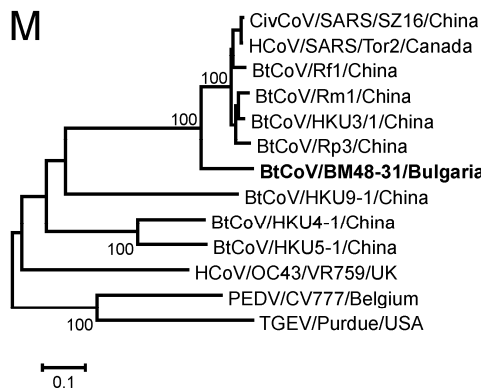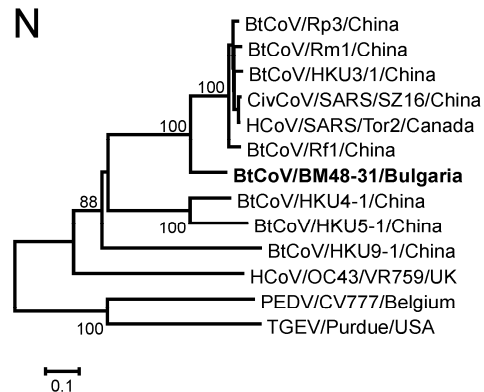



**Supplementary Figure 2. The Open Reading Frame 8 deletion is present in SARS-like viruses from all sampled European Rhinolophid bat species**

PCR primers were designed to amplify a 1,213 base pair amplicon encompassing the Open reading frame 8 genomic region in SARS Coronavirus (CoV) Tor2 (nucleotides 27,468 – 28,681) and European SARS-like viruses. Viruses from bats of the genus *Rhinolophus* were selected to represent all species sampled, containing representatives of each of the two monophyletic clades of SARS-related CoV (six per clade, see Figure 3). Rhi fer = *Rhinolophus ferrumequinum*, Rhi bla = *Rhinolophus blasii*, Rhi meh = *Rhinolophus mehelyi*, Rhi eur = *Rhinolophus euryale*.

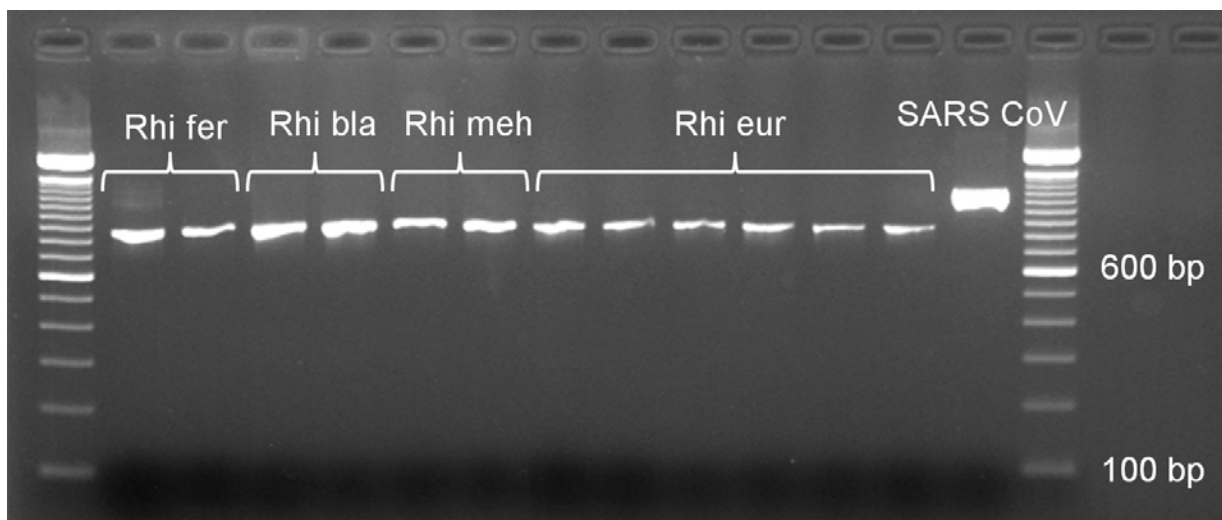

Supplement: supp_84_21_11336__1.pdf [file supp_84_21_11336__1.pdf]
